# Supplementary material for: A Mixed Methods Approach to Exploring the Relationship between Norway Rat (Rattus norvegicus) Abundance and Features of the Urban Environment in an Inner-City Neighborhood of Vancouver, Canada
Source: PubMed Central journal article supplement (PMC4022650; doi:10.1371/journal.pone.0097776), 2014-05-15

# THE ENVIRONMENTAL OBSERVATION TOOL PHOTO LIBRARY

Vancouver Rat Project

Dr. Chelsea G. Himsworth, Alice Feng, & Kirbee Parsons

# Explanation

- This presentation provides
  - ▣ Photo examples for different rating systems and subjects used in the Vancouver Rat Project Environmental Observation Tool
  - ▣ The following ratings are covered:
    - Building Condition
    - Grounds Condition
    - Green Space Characteristics
    - Presence of Waste
    - Paved Surface Condition
  - ▣ Miscellaneous Subjects:
    - Garbage Receptacles
    - Rat Holes
    - Rat Corridors

# Building Condition



- Rates the general state of repair/disrepair of buildings

# Building Condition

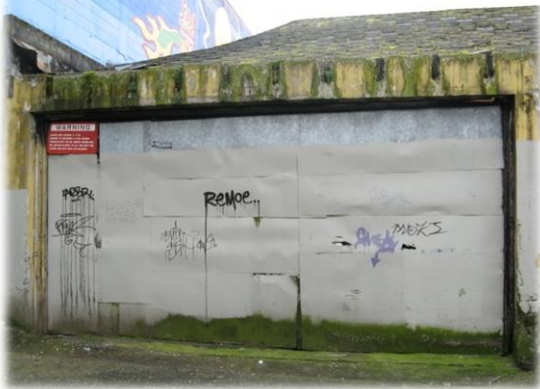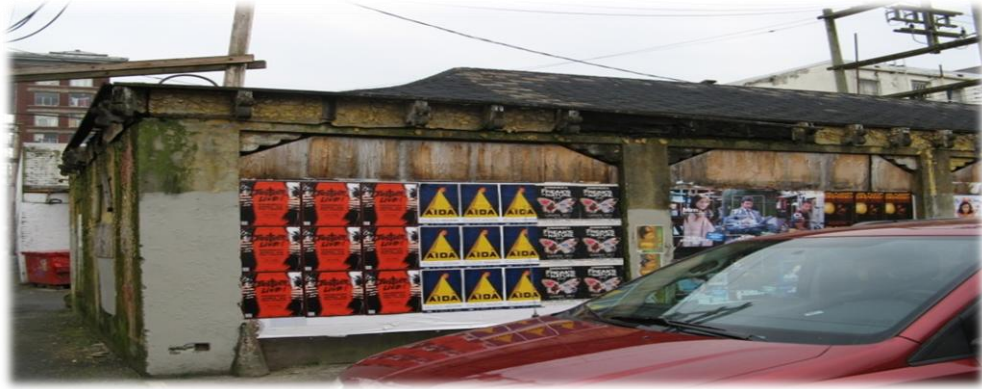

Extremely poor: Structure looks unfit/unsafe for humans. Significant amount of broken glass, peeling paint, damaged structures (e.g. stairs, walls, etc.). May include abandoned structures and properties.

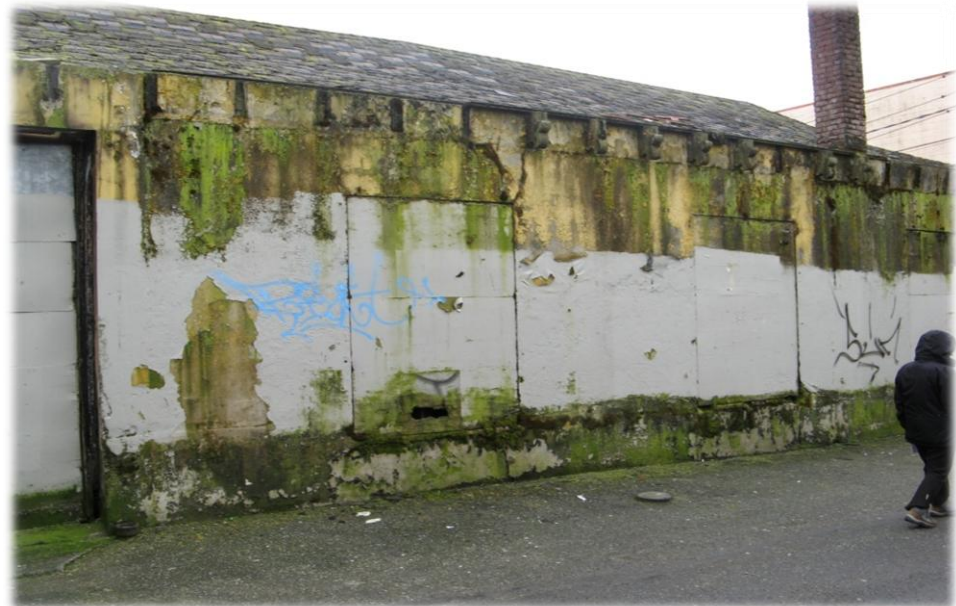

# Building Condition

Poor: Adequate living/workings conditions (albeit poor environment). Moderate amount of broken glass, peeling paint, damaged structures, etc. Considerable amount of work needed to improve property.

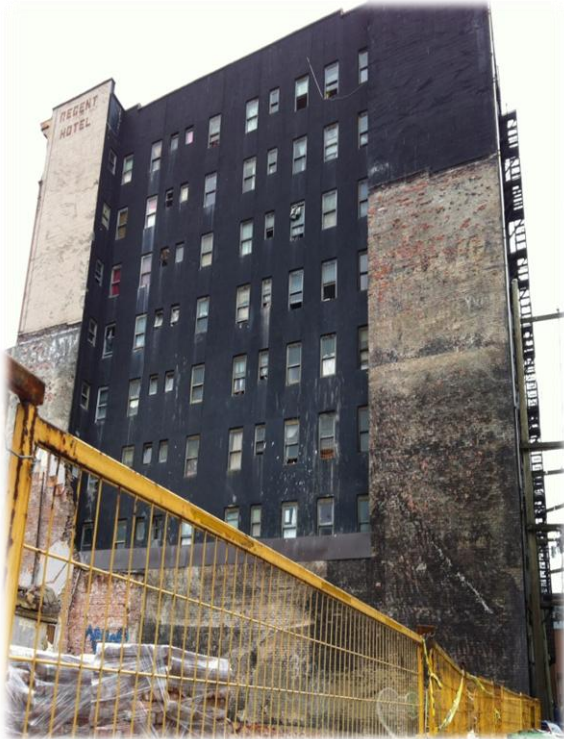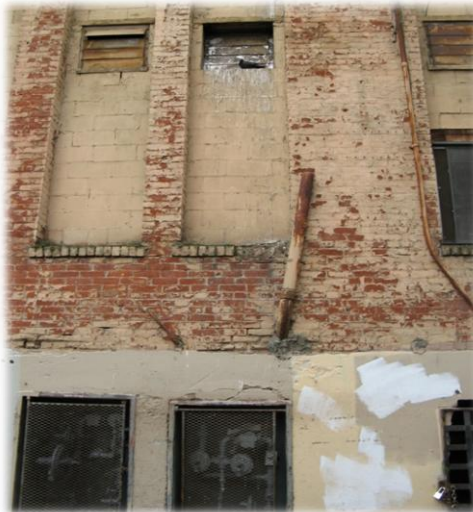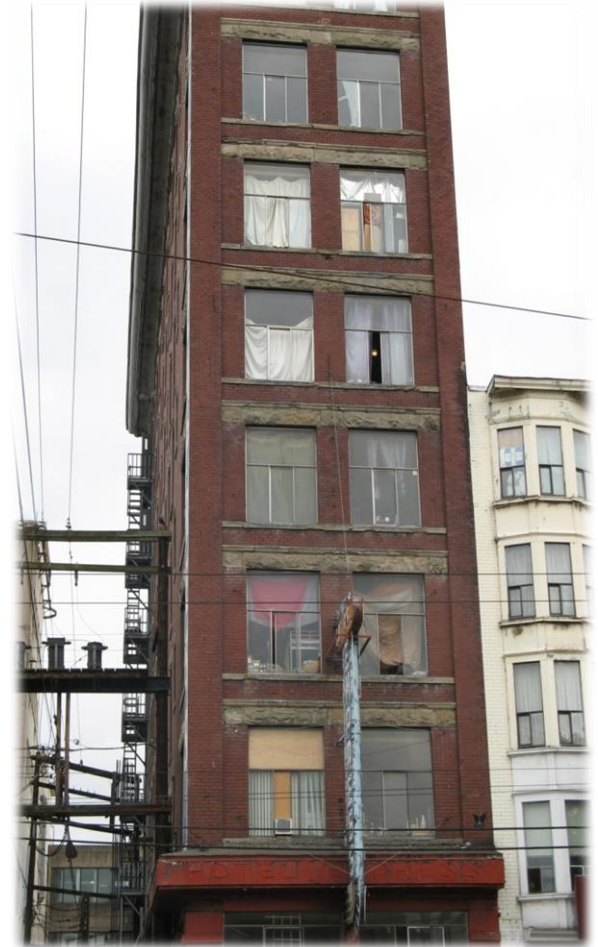

# Building Condition

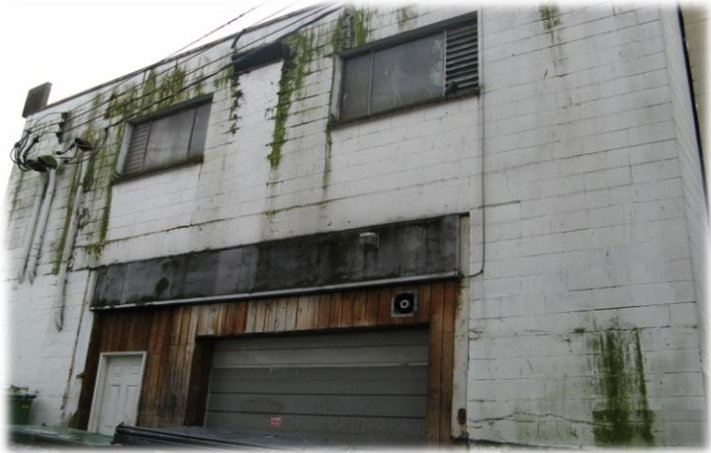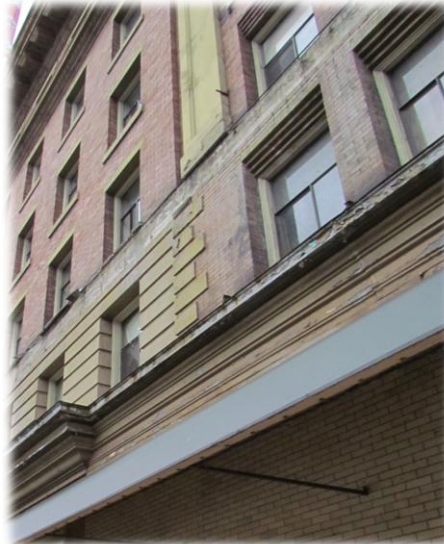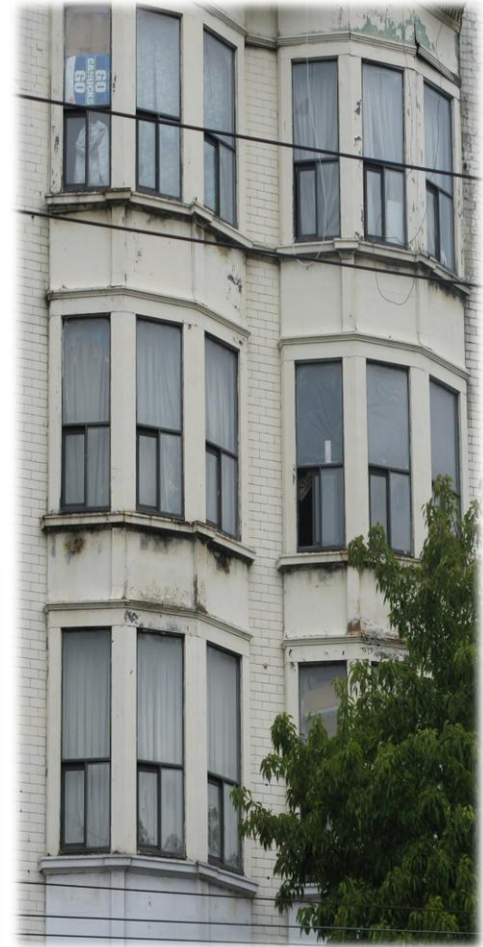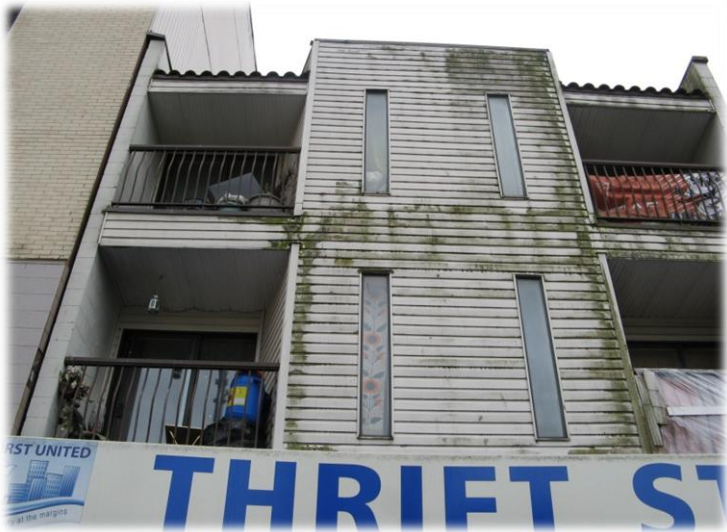

Fair: Passable conditions with some attempt to keep property but moderate success. Some broken windows, peeling paint, damaged structures, etc. Would recommend a moderate amount of repair. Some refuse/overgrowth.

# Building Condition

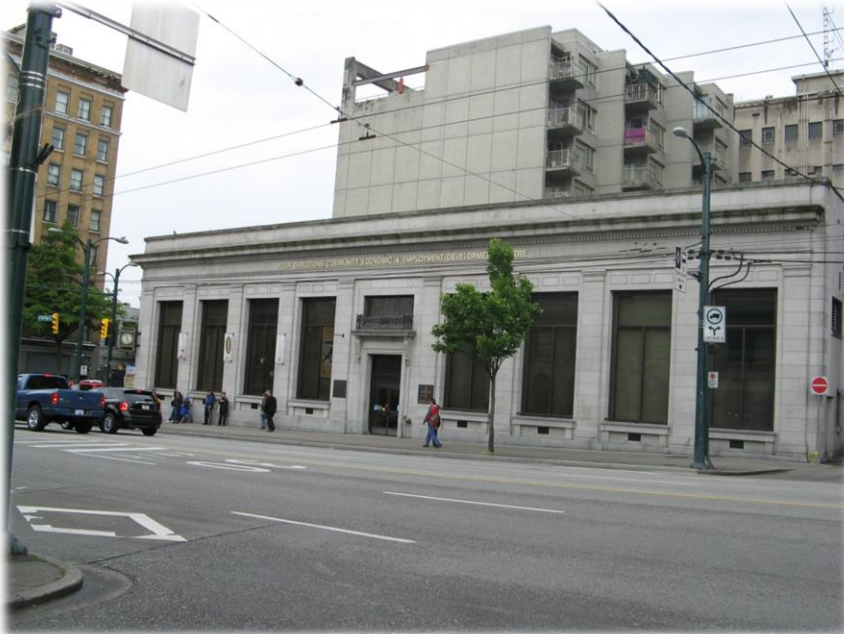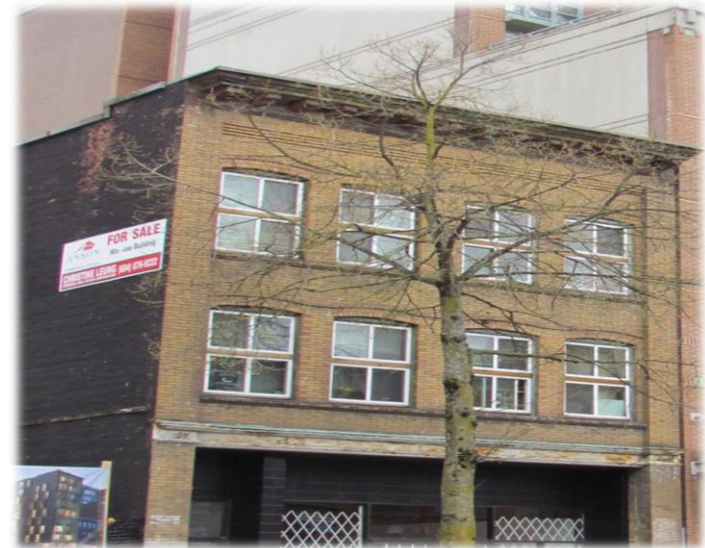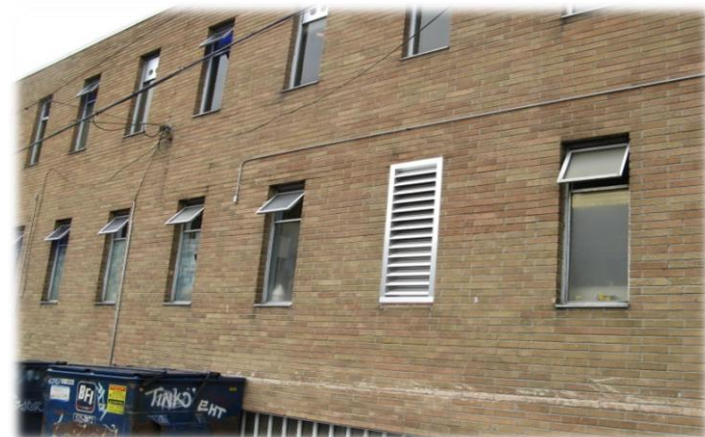

Good: In decent working/living condition. Some repairs could be done (mainly for aesthetic reasons). Looks clean and well kept.

# Building Condition

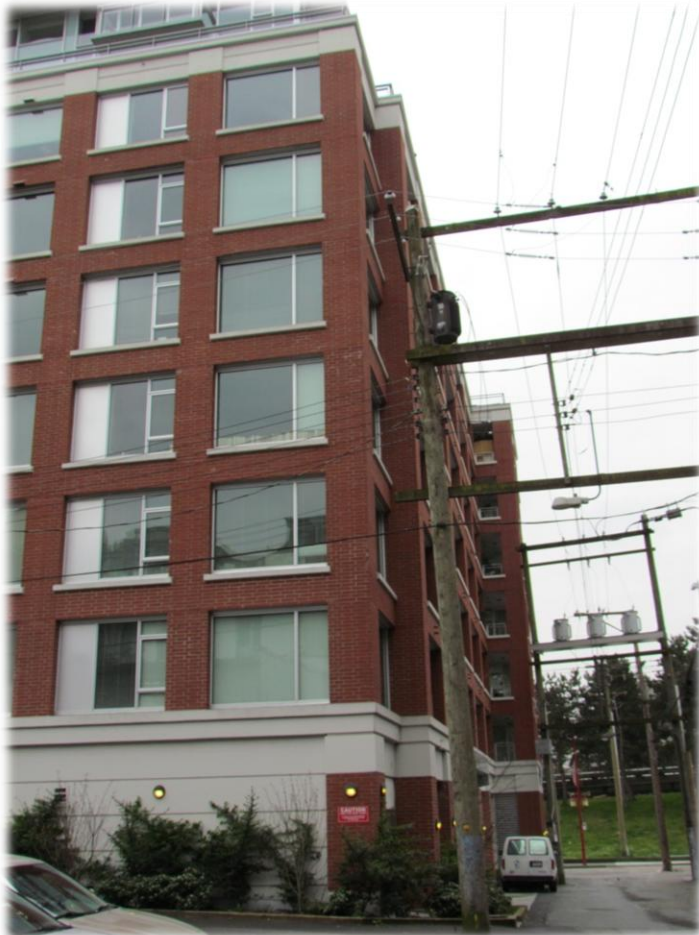

Excellent: Immaculate/near perfect condition. No repair needed. Shows that extra care and effort has been directed towards upkeep.

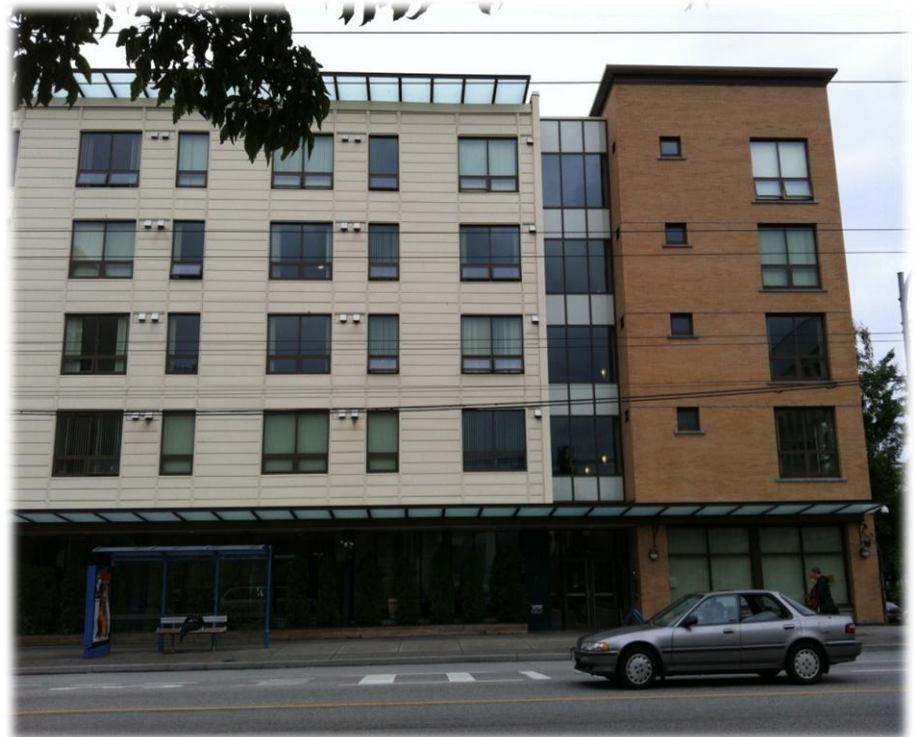



# Grounds condition

- Grounds are defined as any space or parcel within a block that is not occupied by a building
  - ▣ Includes open, undeveloped or green space parcels, as well as open spaces in a parcel with structures
- Rated for the general state of upkeep of a property ( not including building structures)

# Grounds Condition

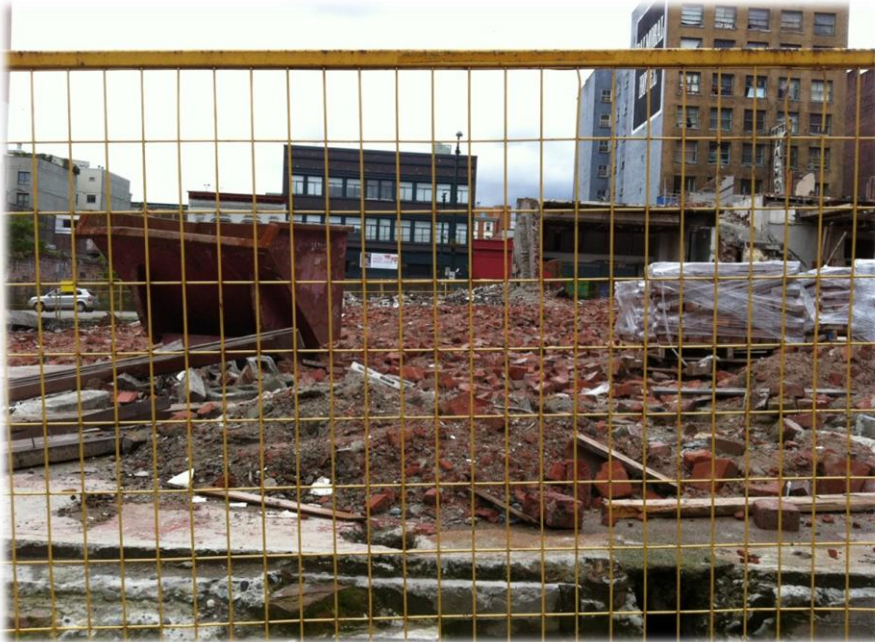

Extremely Poor: Dirty and unkempt property with little or no apparent regard for upkeep of property. Major overhaul needed to improve property.

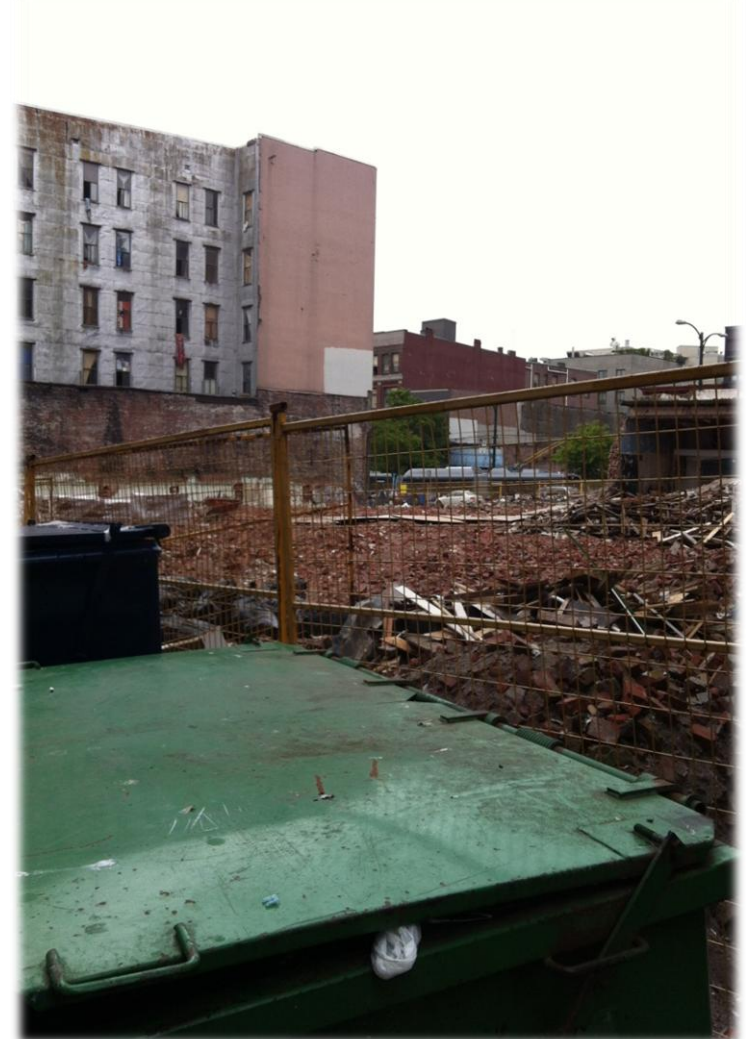

# Grounds Condition

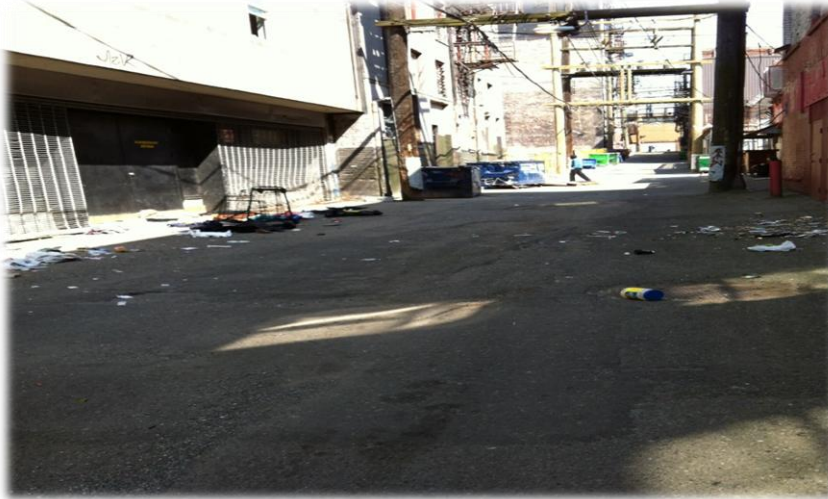

Poor: Considerable amount of work needed to improve property. Moderate amounts of refuse and/or overgrowth.

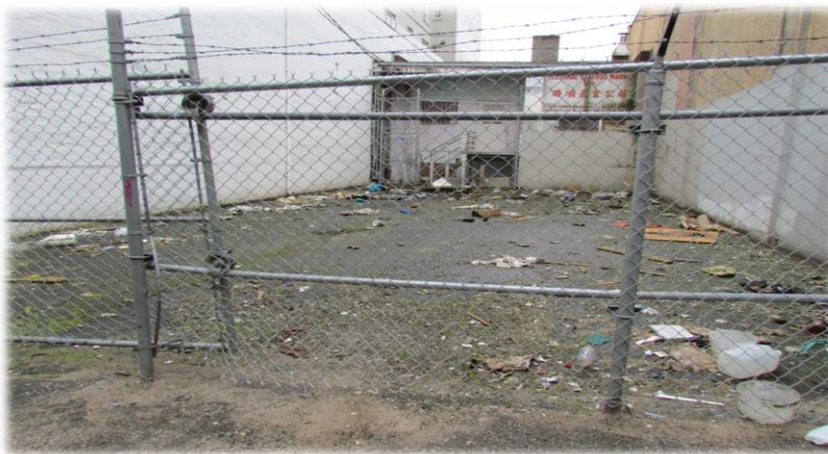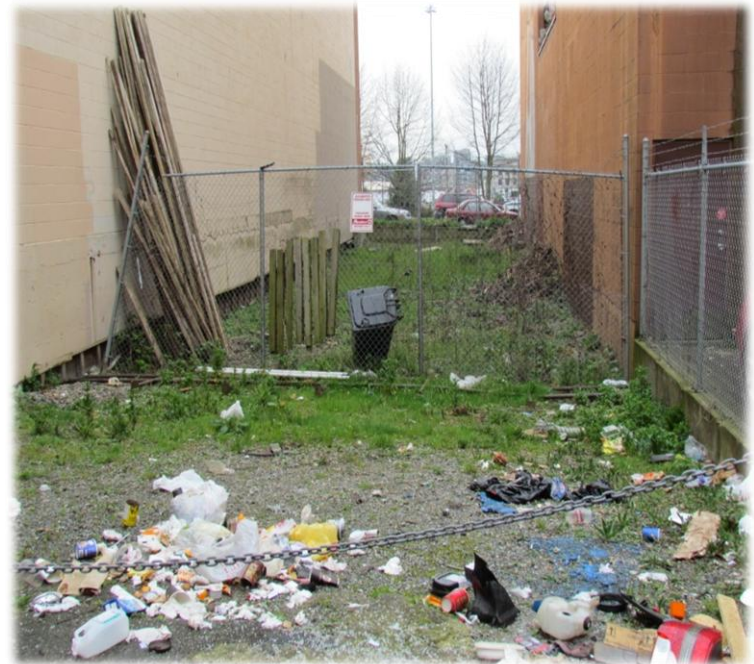

# Grounds Condition

Fair: Passable conditions with some attempt to keep property but moderate success. Some refuse/overgrowth.

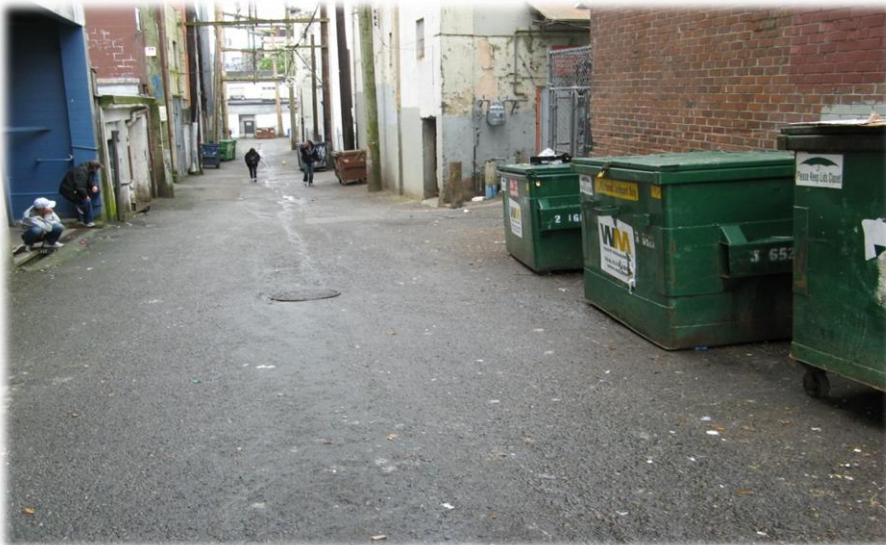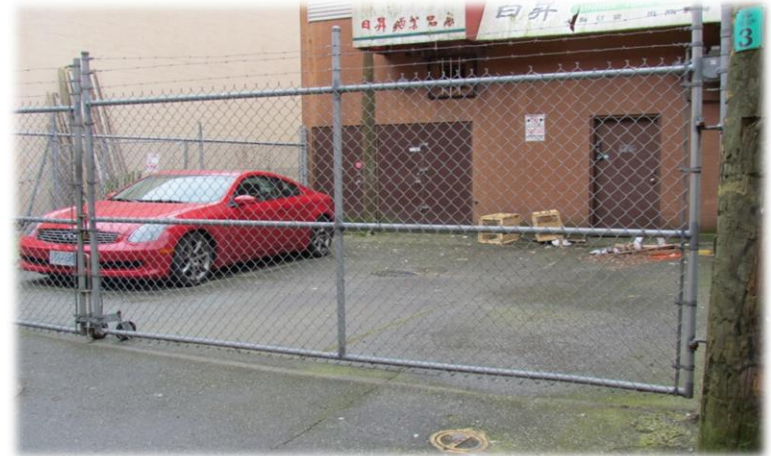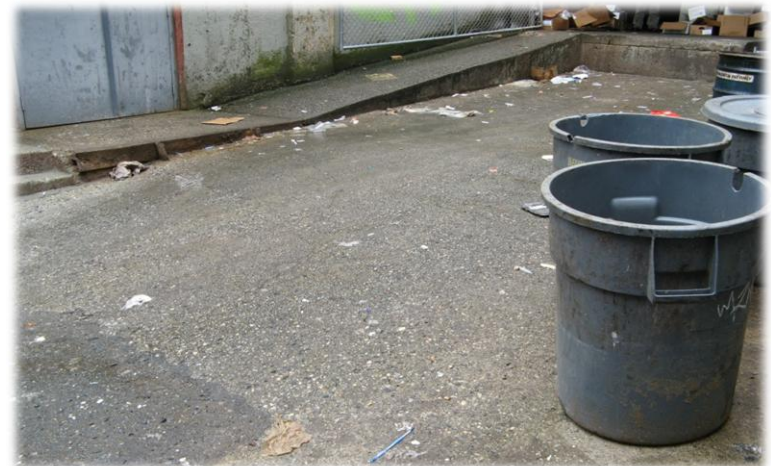

# Grounds Condition

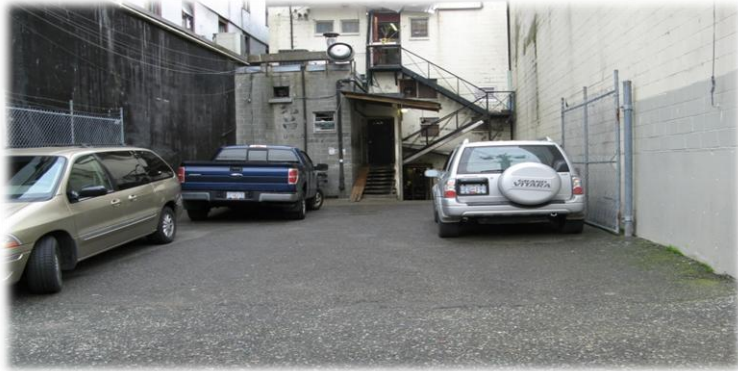

Good: Looks clean and well kept.

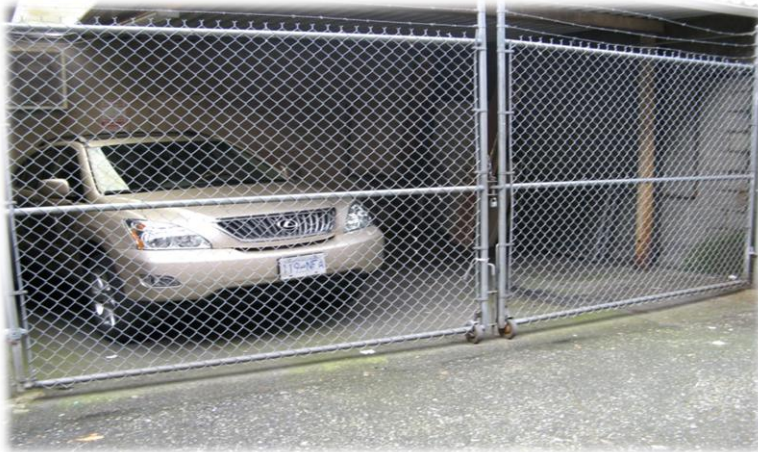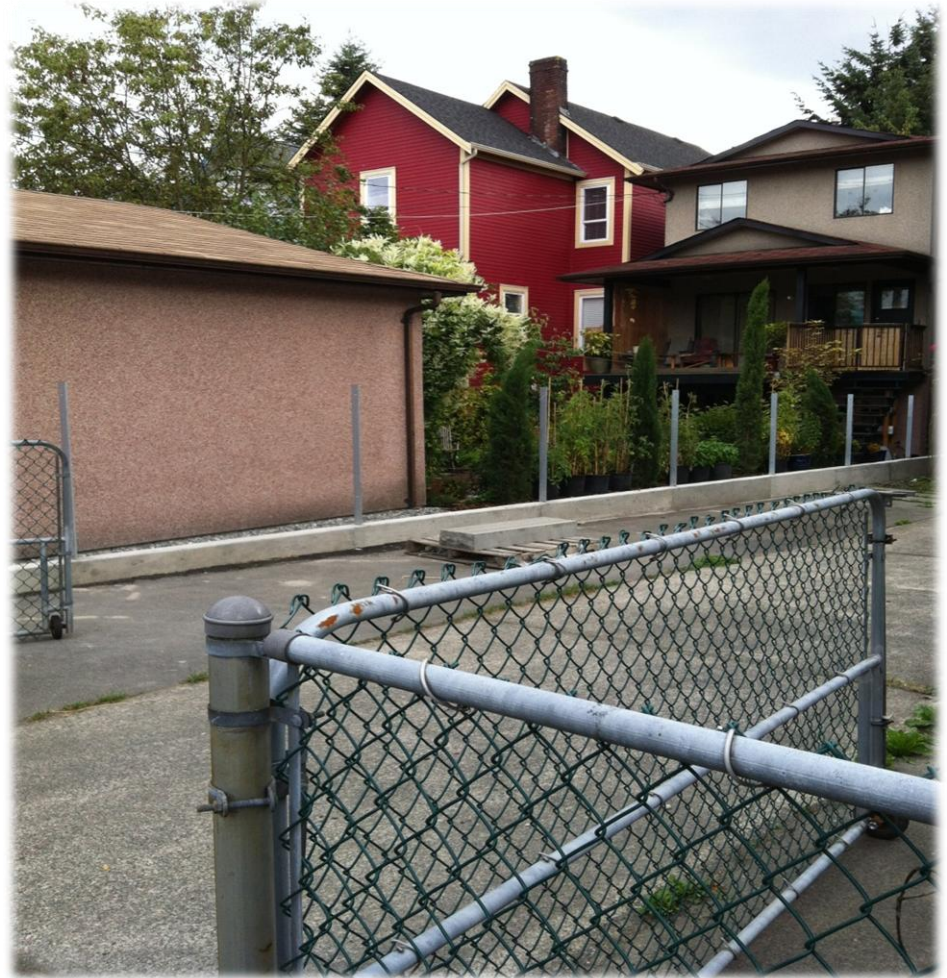

# Grounds Condition

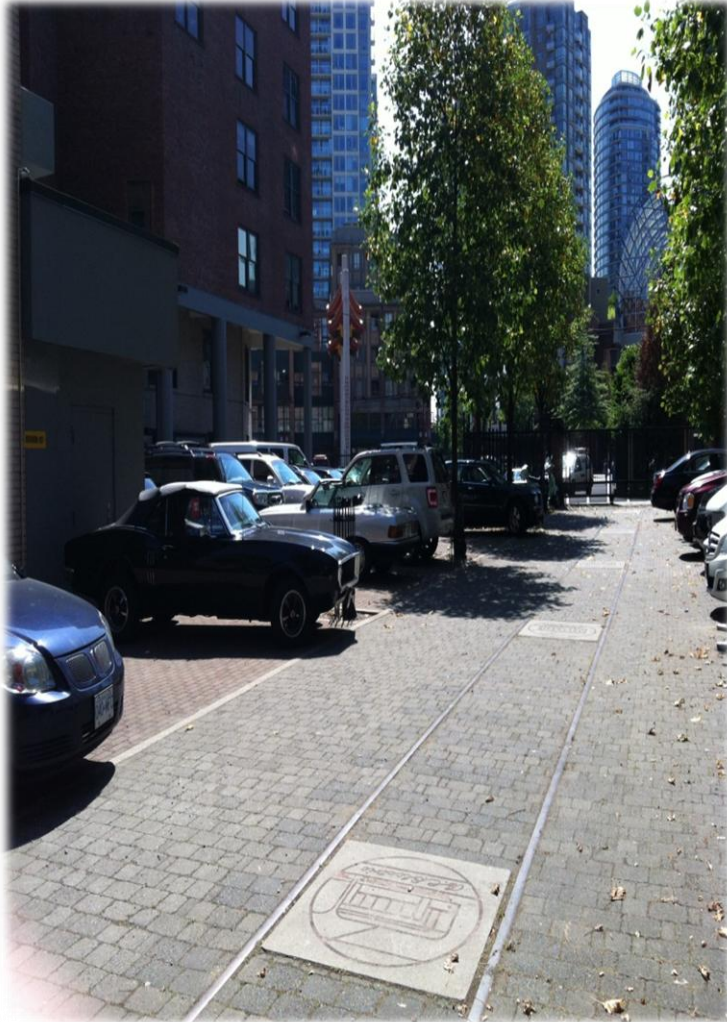

Excellent: Immaculate/near perfect condition. Shows that extra care and effort has been directed towards the upkeep.

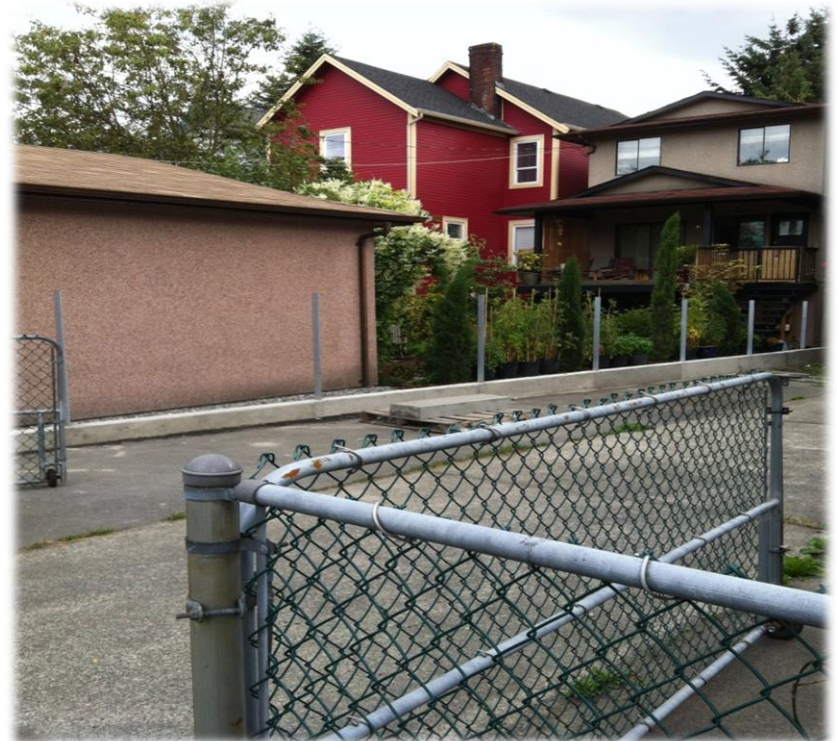

# Green Space

For an area to be considered a green space it must:

- 1) Show significant plant growth ( i.e., areas with sparse grass or weeds should NOT be included) and
- 2) Occupy a significant proportion of the property parcel ( i.e., very small areas of plant growth in an otherwise build up parcel are not included).

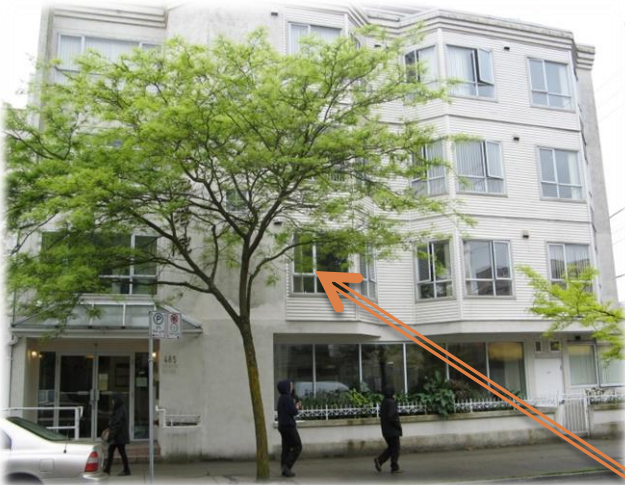

NOT  
Green  
space

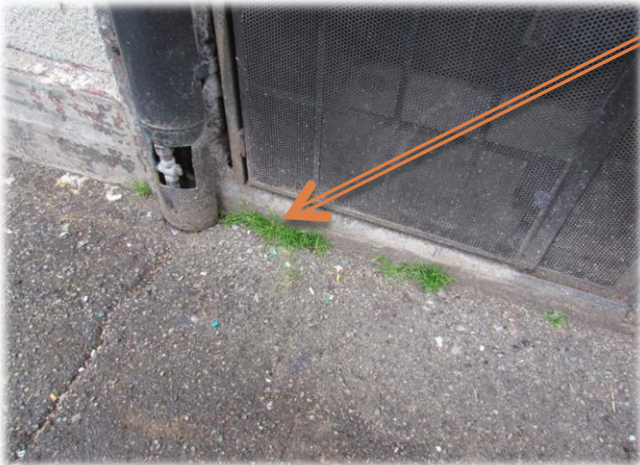

Green  
space

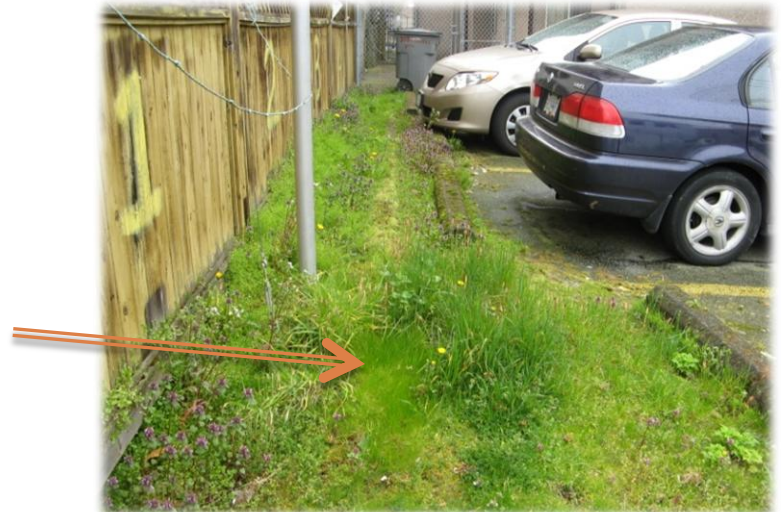

# Green Space

Unkempt green space: an area that is overgrown by vegetation and/or does not appear to receive regular maintenance

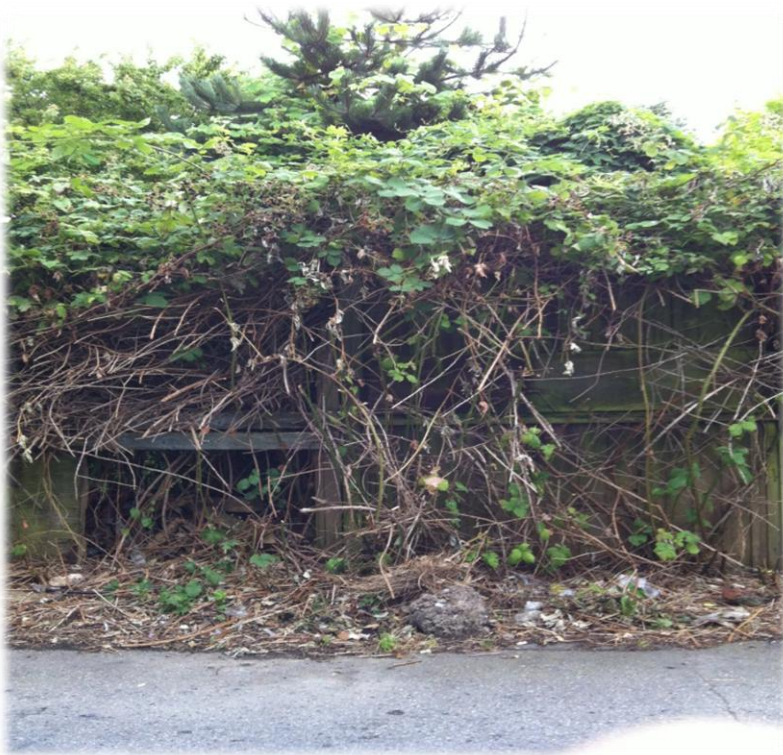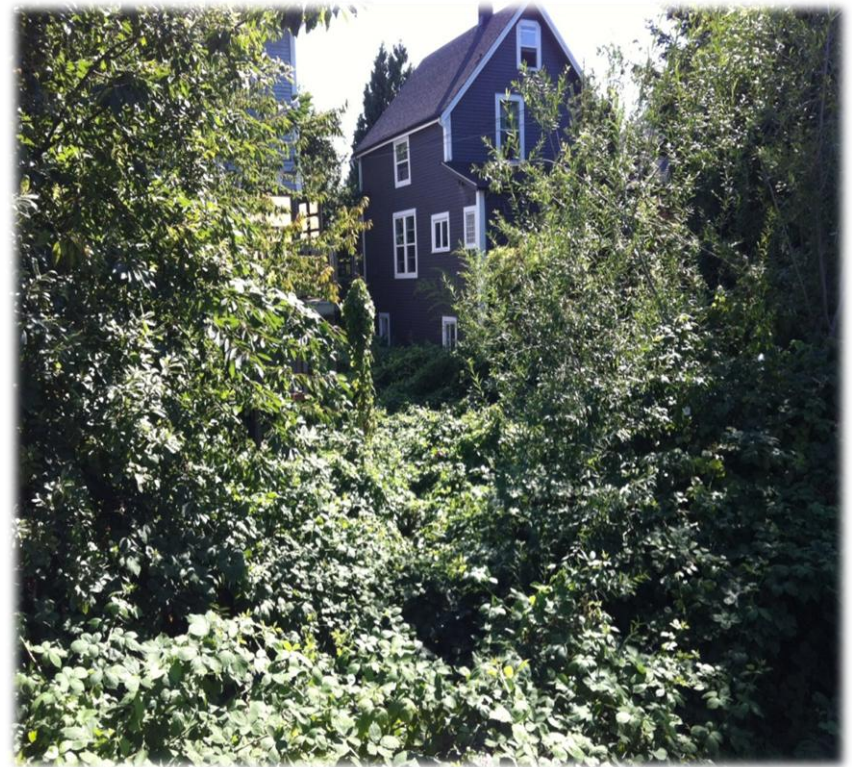



# Green Space

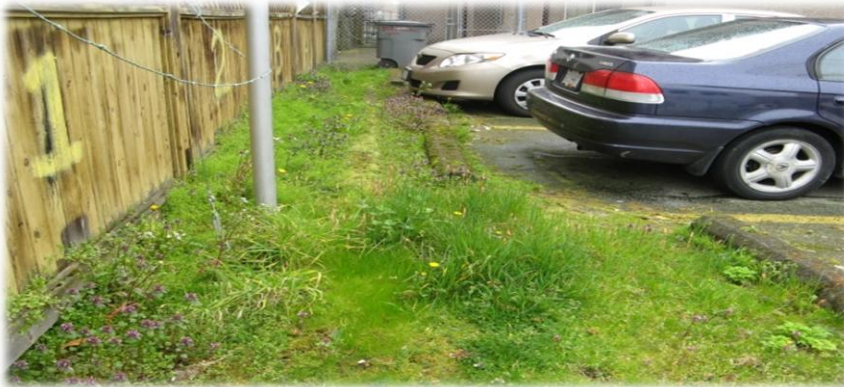

Well-kept green space: a green space that receives regular maintenance. Includes lawns, non-food gardens and or other landscaped areas.

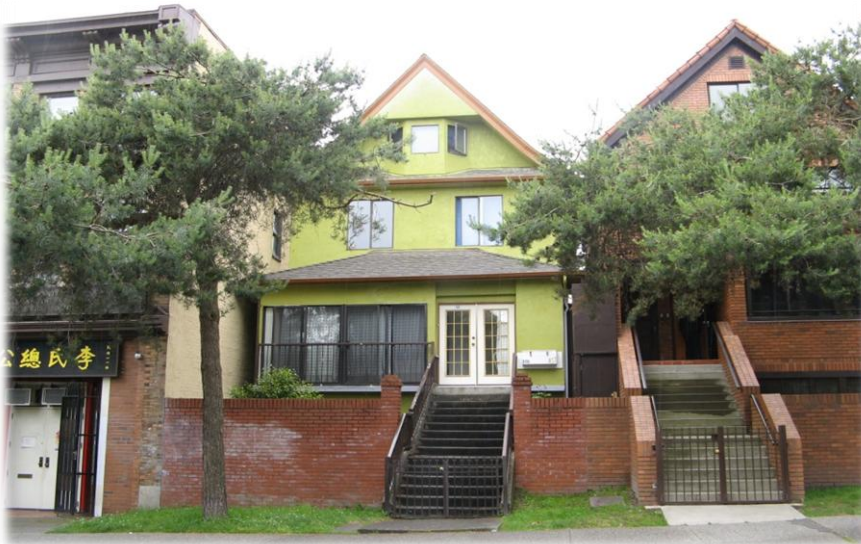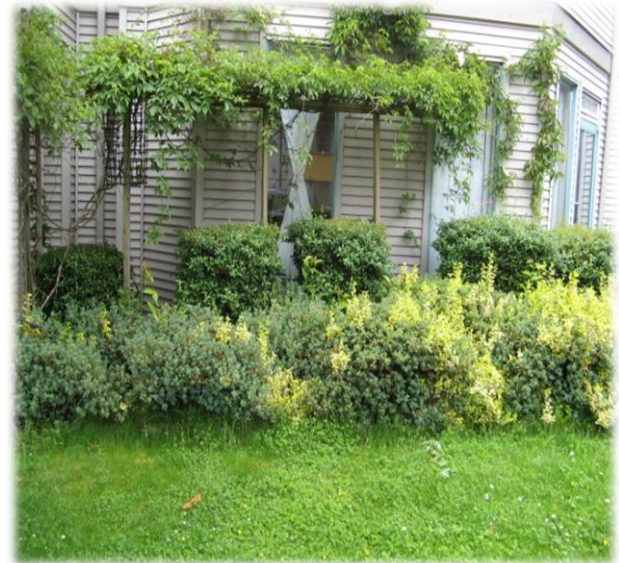

# Green Space

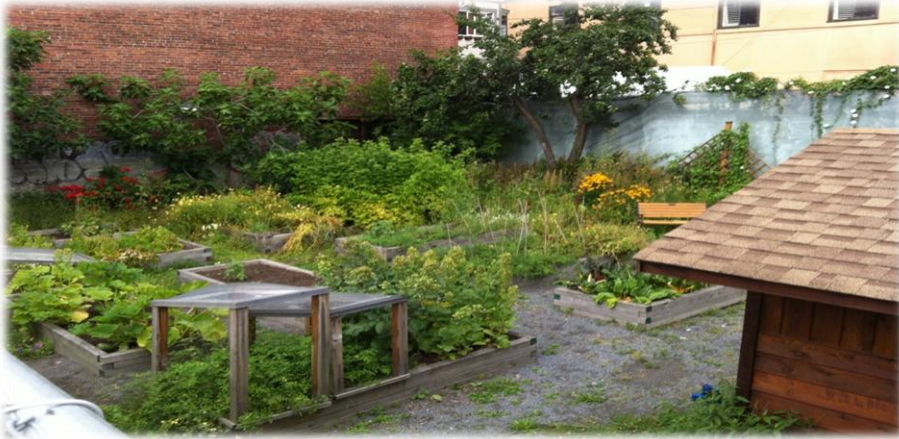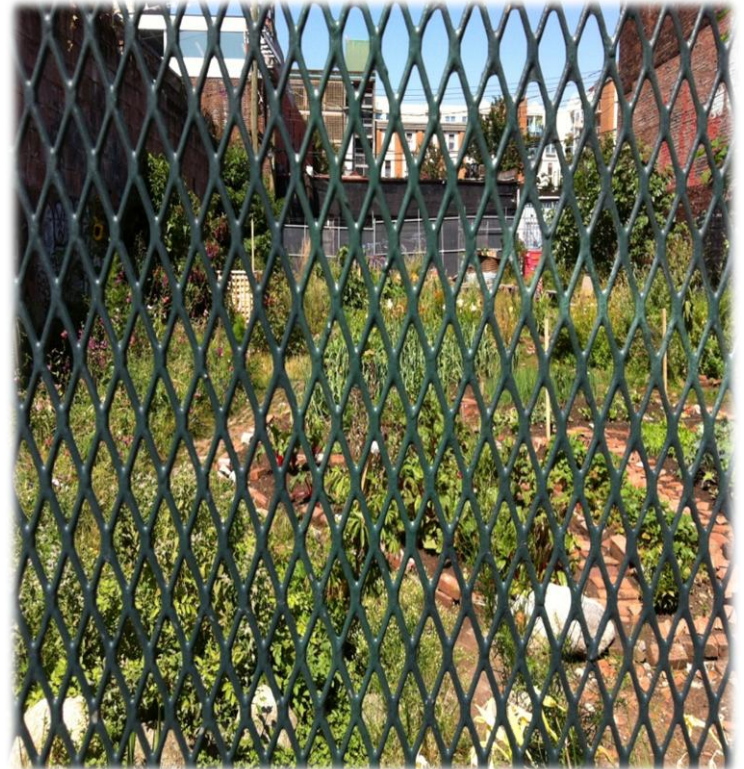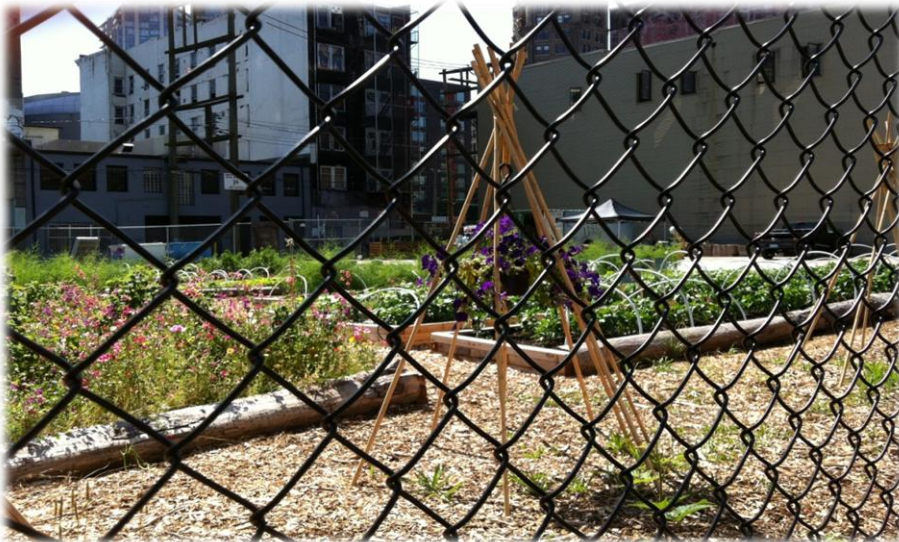

Food Garden: a green space that is in any way geared towards the production of produce.

# Paved Surfaces



- Defined as any surface in a block that is paved
- Rated for its general state of repair/disrepair

# Paved Surfaces

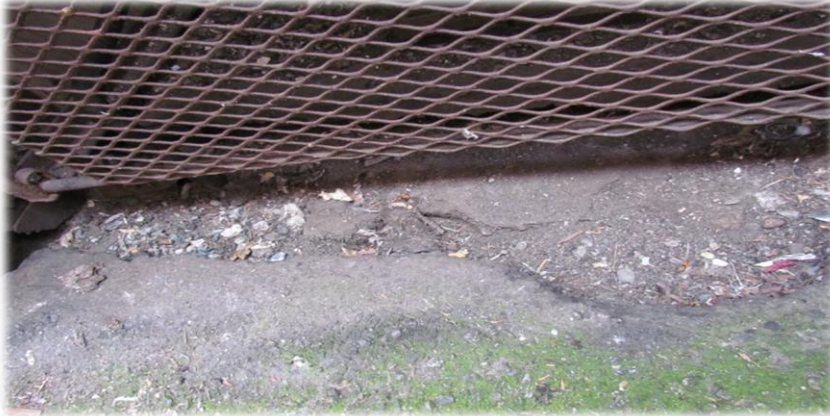

Poor: Frequent/severe deep cracking of pavement (cracking sufficient to permit rat burrowing). Alley surface is broken up and in need of serious repair.

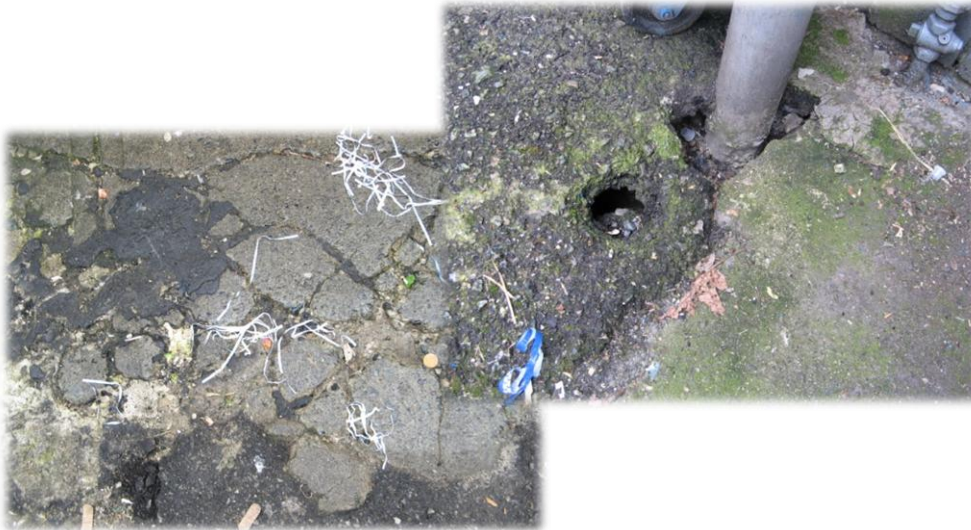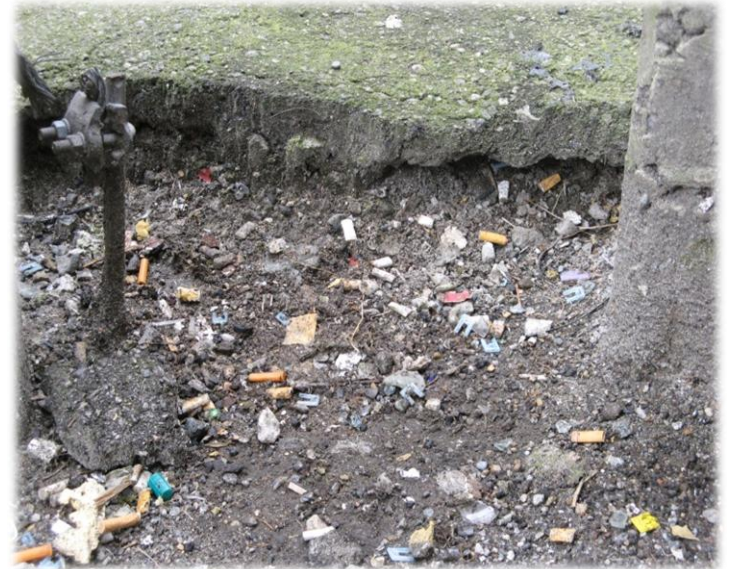

# Paved Surfaces

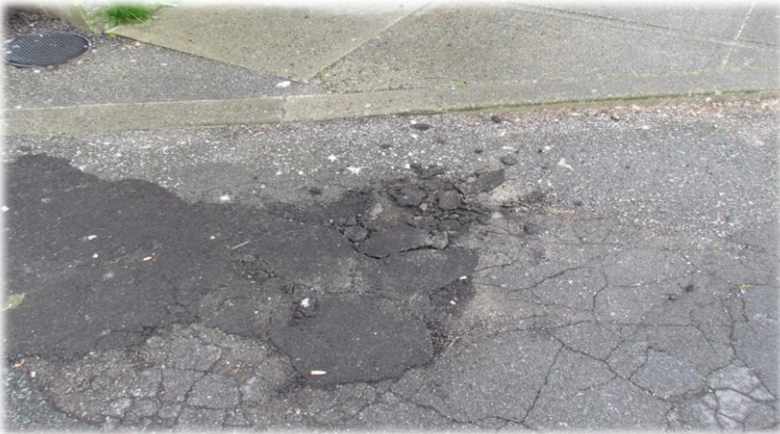

Fair: Moderate amount of cracked pavement. Cracking is mainly superficial (unlikely to promote rat harborage).

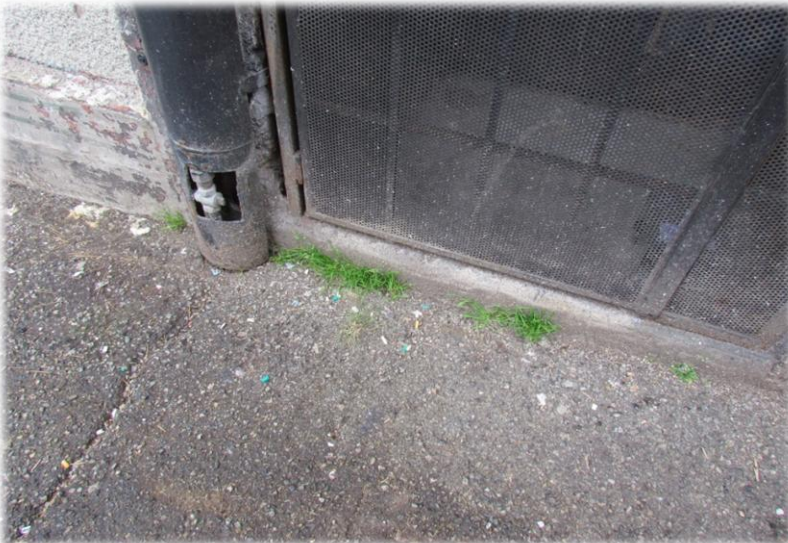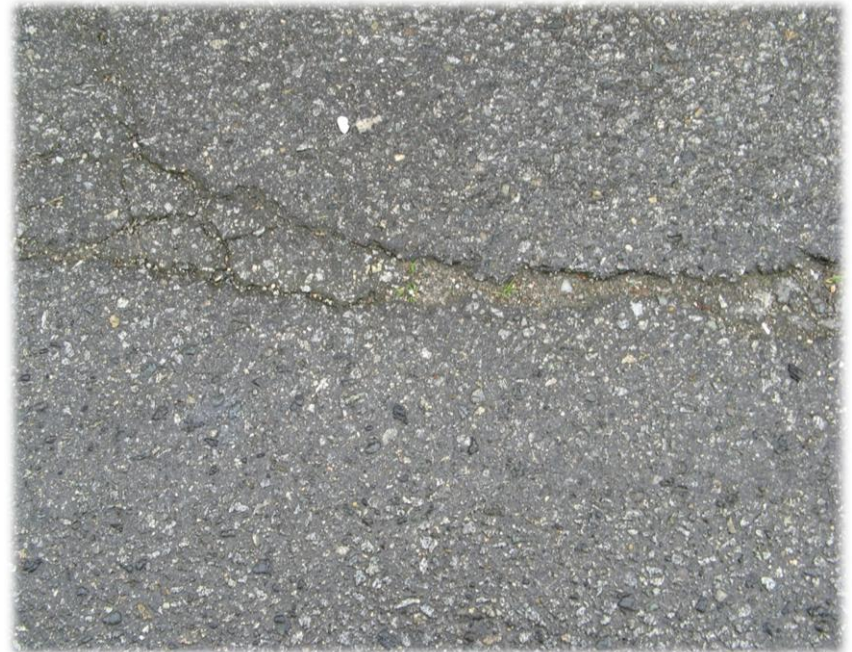

# Paved Surfaces

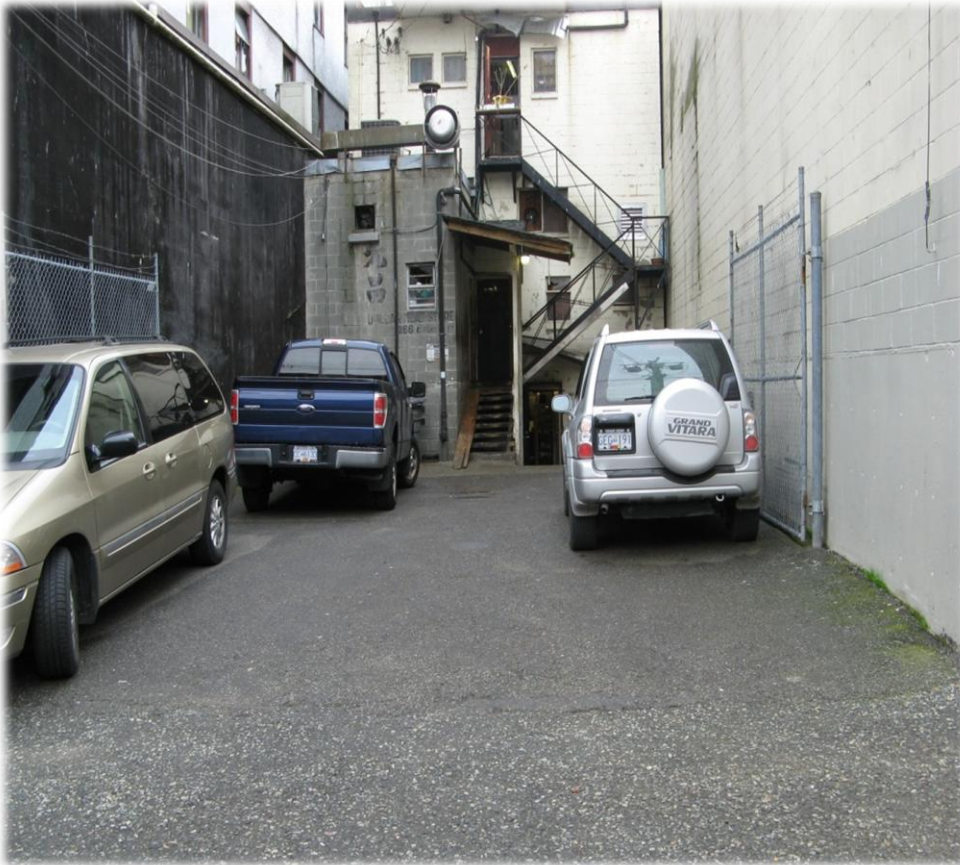

Good: Generally even surface with minimal cracking.

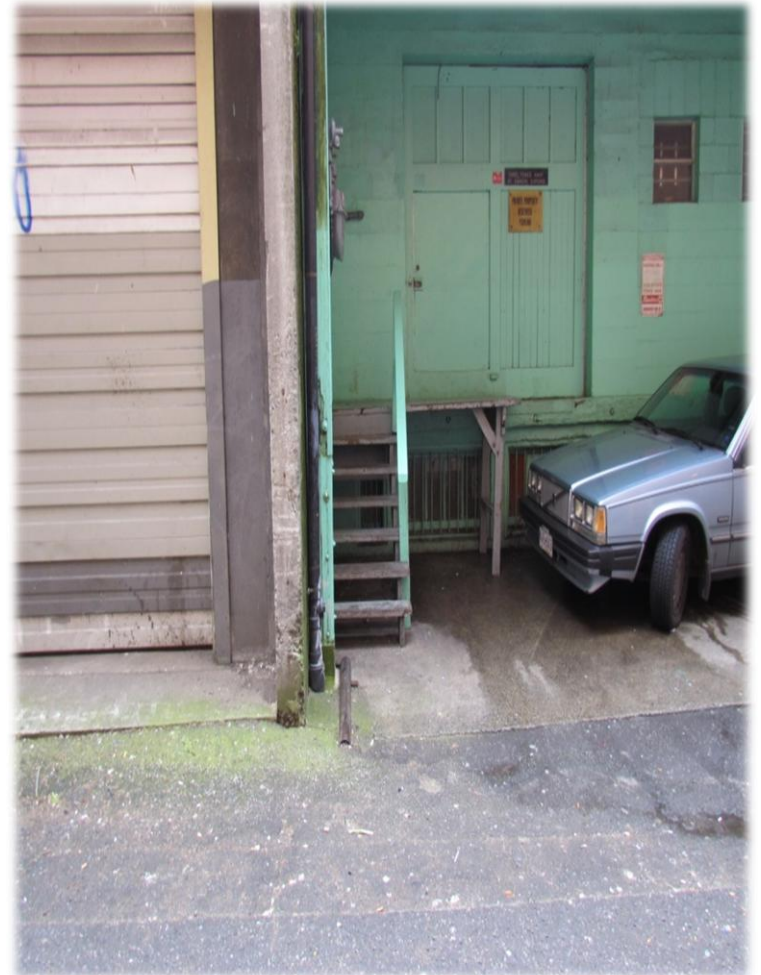

# Non-Paved Surfaces

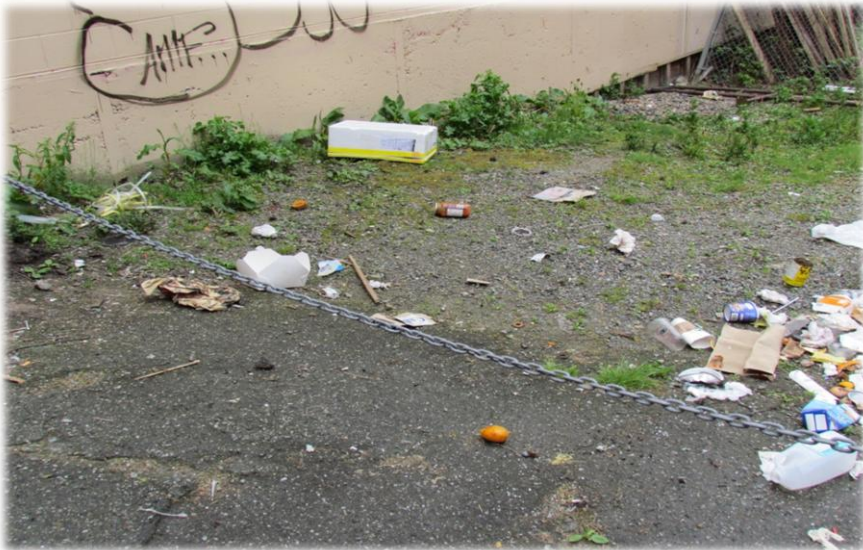

Defined as any space with 1 m of the alley that is not paved.

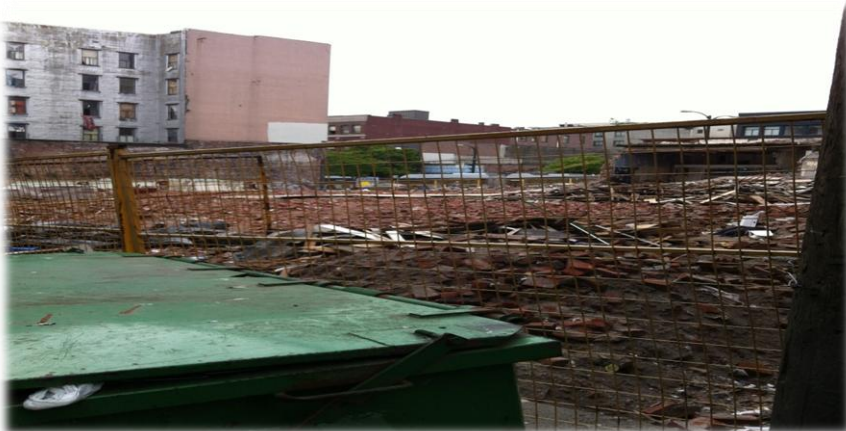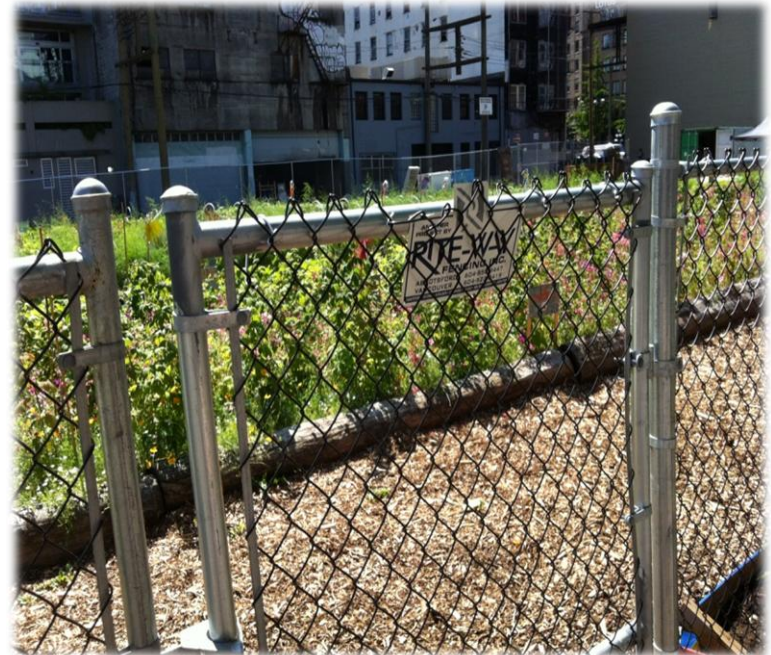

# Presence of Garbage in/near Alley

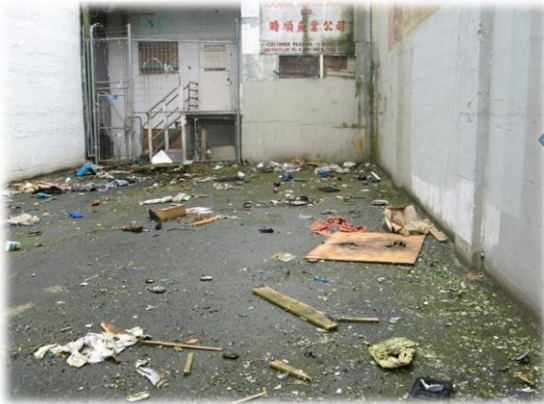

← A lot of waste when there is a high volume of waste and/or waste is present throughout a large proportion of the alley.

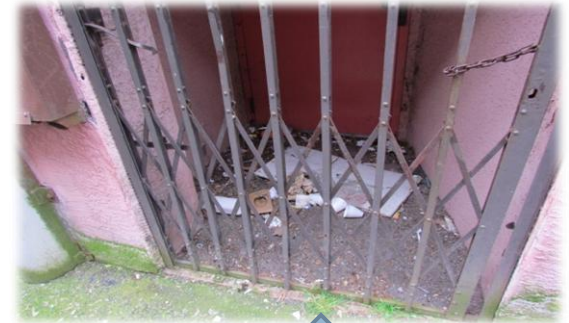

↑ A little waste is when there is a very low volume of waste or the waste is confined to a small area.

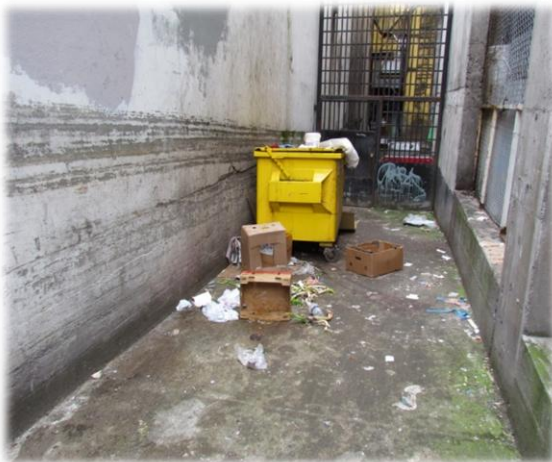

← Some waste is somewhere between a little and a lot.

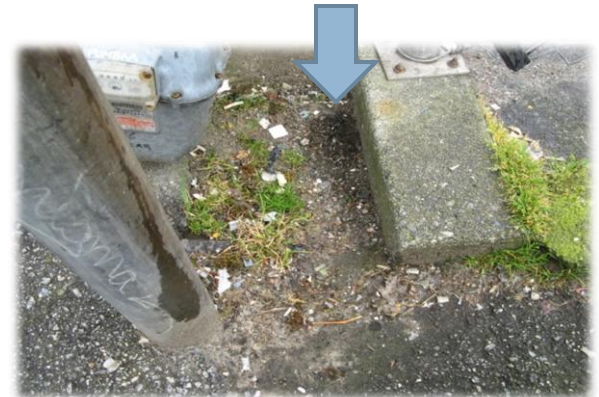



# Overflowing Garbage Receptacles

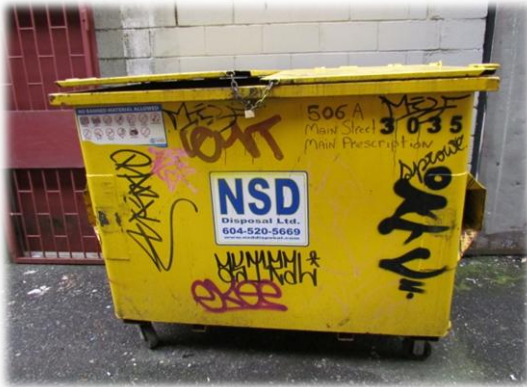

None

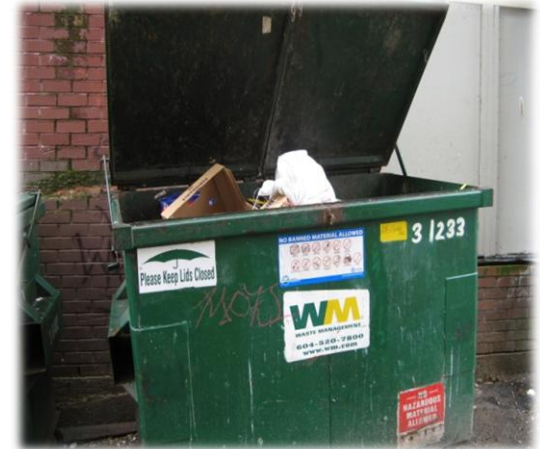

A little

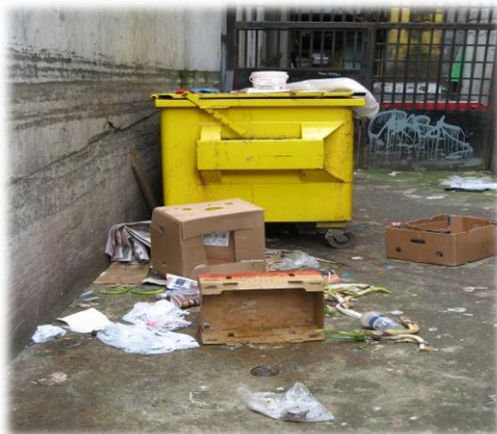

Some

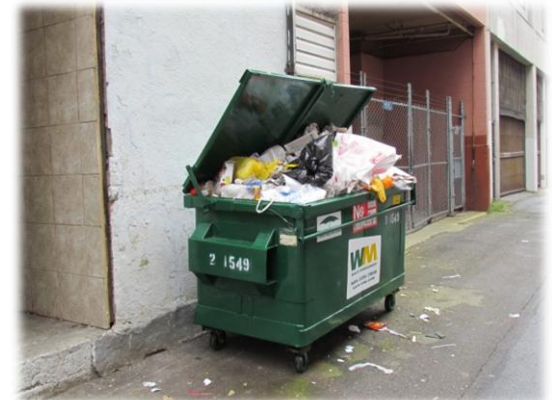

A lot

# Garbage Receptacles

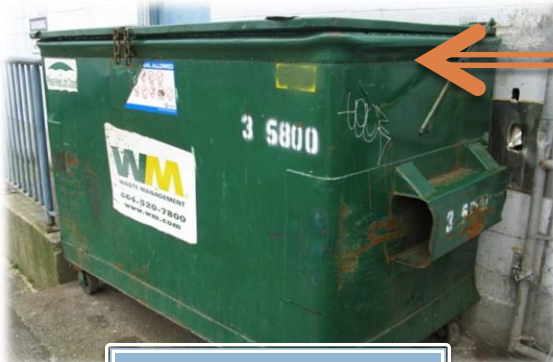

Commercial

Garbage

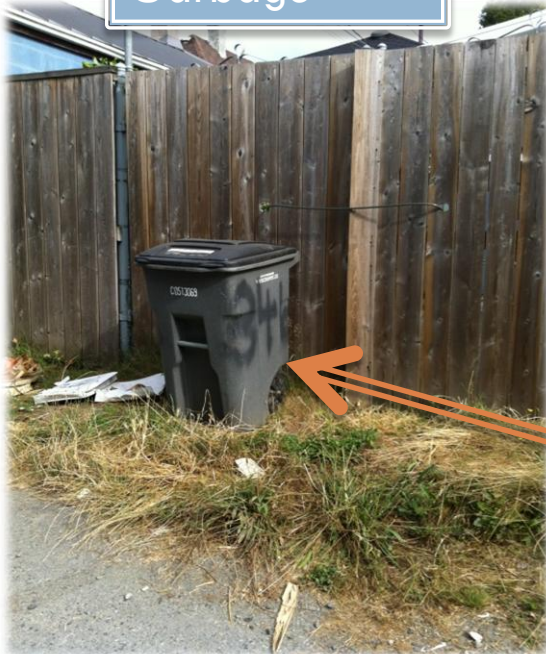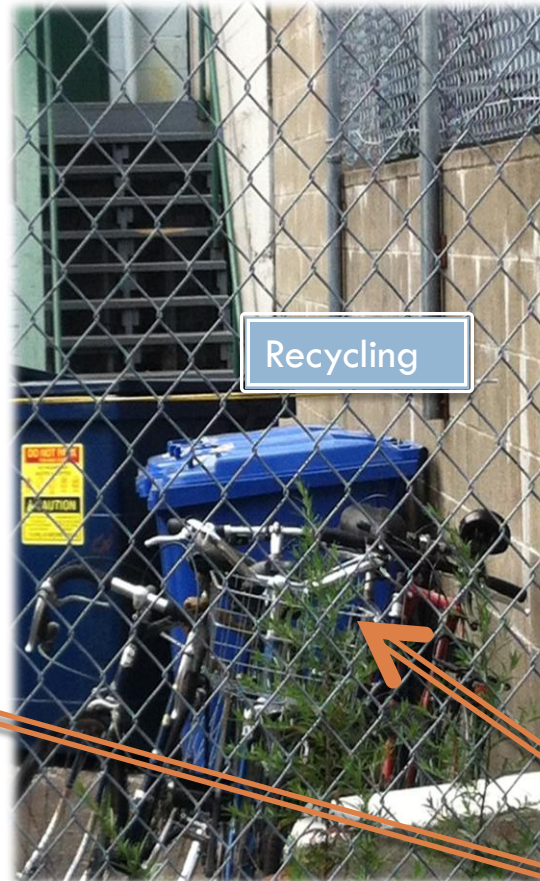

Recycling

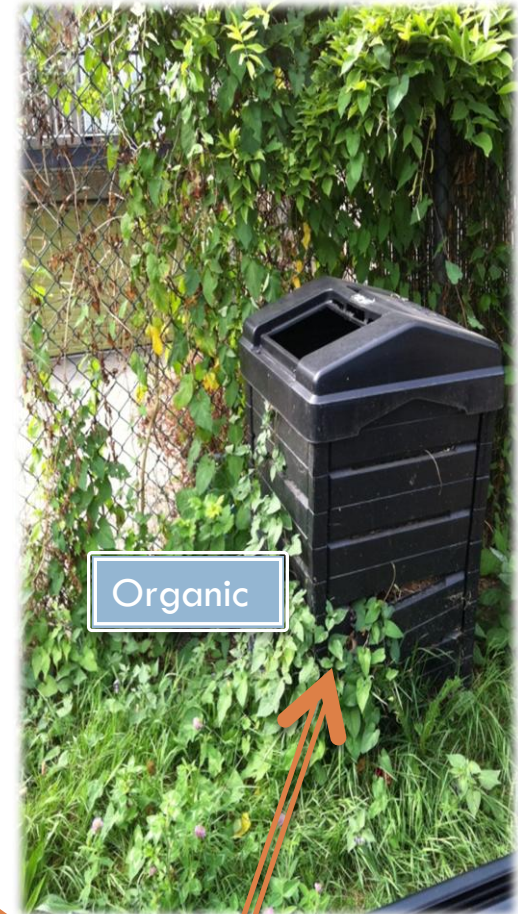

Organic

Private

# Rat Holes

Burrows in soil or pavement that look like they could have been made by a rat.

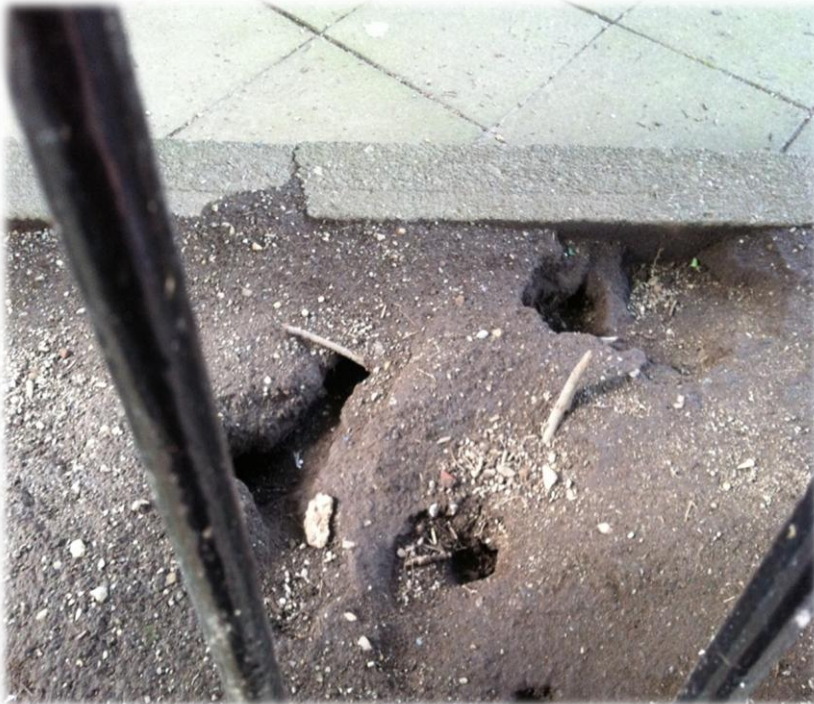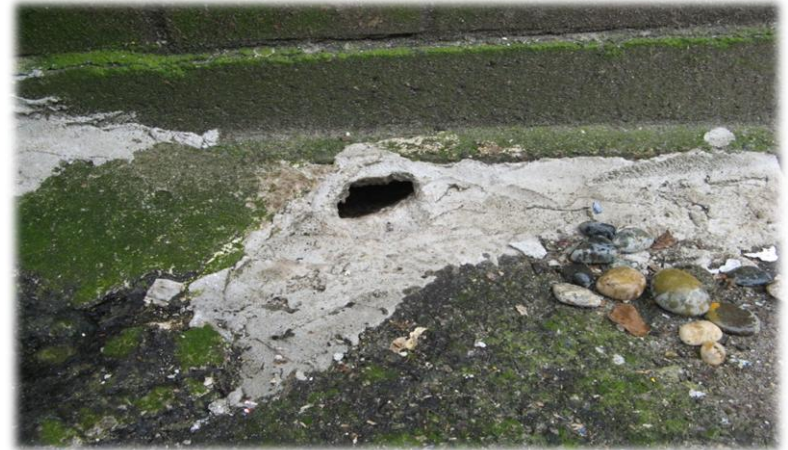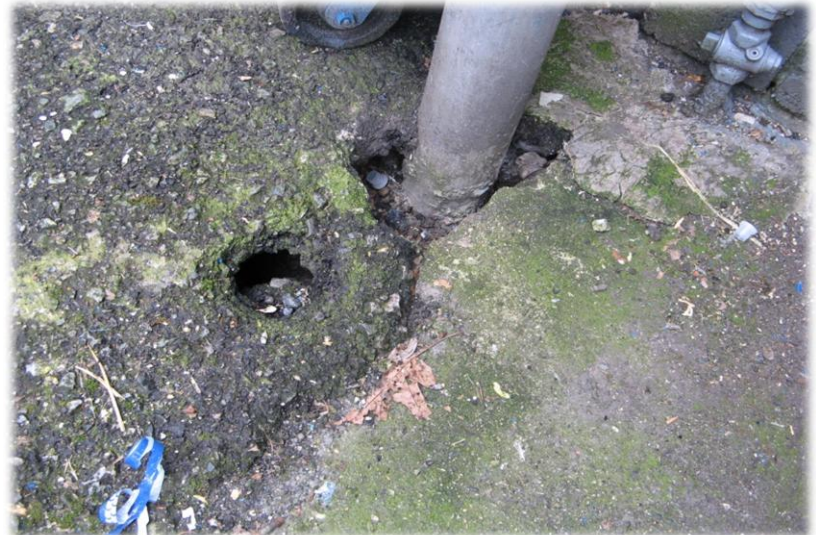

# Rat Corridors

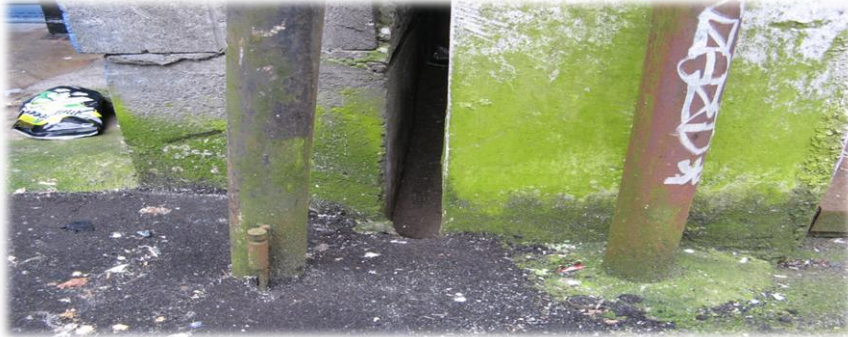

Defined as a narrow space in between buildings that is wide enough for rats to use as transportation routes.

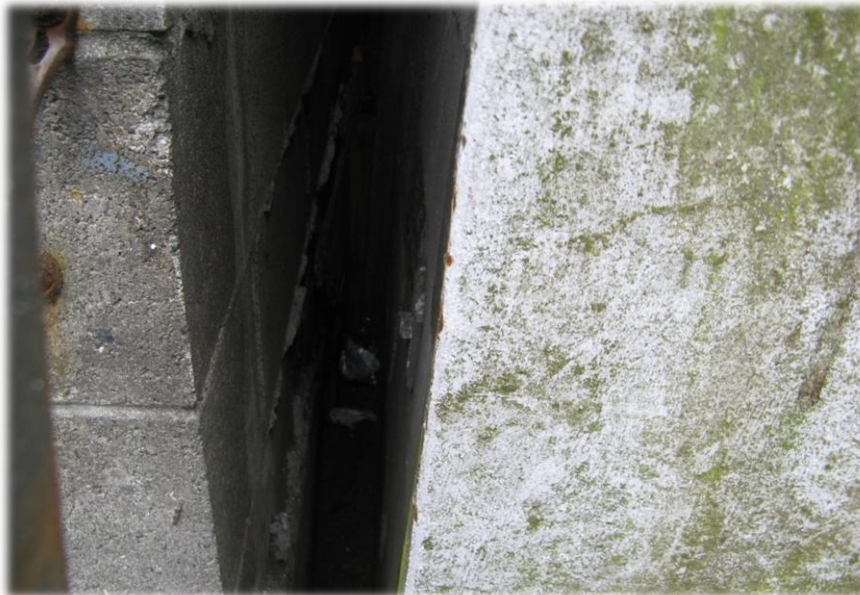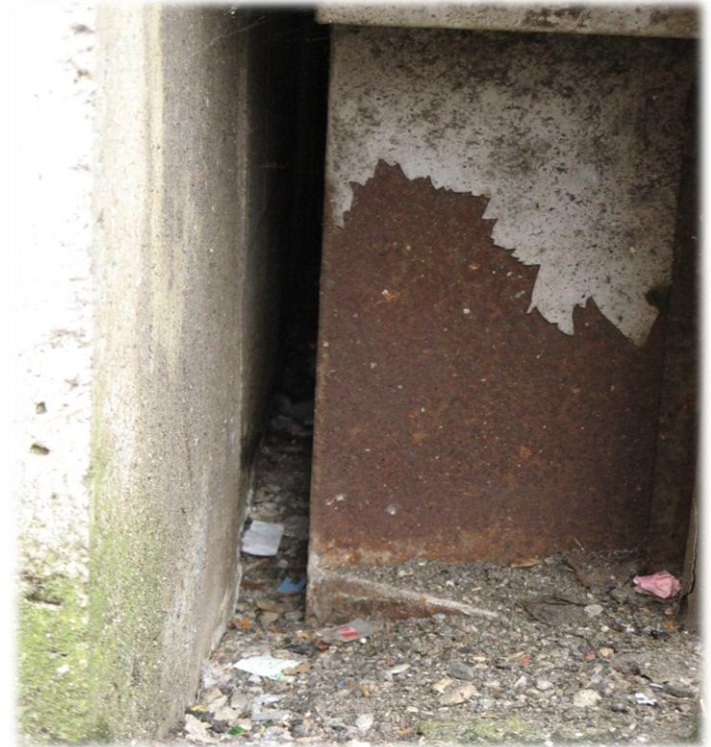

Supplement: pone.0097776.s002.pdf [file pone.0097776.s002.pdf]
